# Supplementary material for: A novel strategy for exploring food originated anti-adipogenesis substances and mechanism by structural similarity evaluation, ADME prediction, network pharmacology and experimental validation
Source: Royal Society of Chemistry journal article supplement (doi:10.1039/d1fo01124c), 2021-01-01
Supplement: d1fo01124c1.pdf [file d1fo01124c1.pdf]

Supplementary materials

**Table S1** Sequence of primers used in quantitative RT-PCR

| Gene           | Accession number | Forward primers<br>(5'-3') | Reverse primers(5'-3') |
|----------------|------------------|----------------------------|------------------------|
| PPAR $\gamma$  | NM_001127330.2   | CGCTGATGCACTGCCTATGA       | AGAGGTCCACAGAGCTGATTCC |
| $\beta$ -actin | NM_007393.5      | ACTGCTCTGGCTCCTAGCAC       | CCACCGATCCACACAGAGTA   |

**Table S2** The explored candidates based on genistein

| Name                             | Score | SMILES format                                         |
|----------------------------------|-------|-------------------------------------------------------|
| ZINC18825330( <b>genistein</b> ) | 0.994 | <chem>Oc1ccc(cc1)c1coc2c(c1=O)c(O)cc(c2)O</chem>      |
| ZINC06525249                     | 0.988 | <chem>Oc1ccc(c(c1)O)c1coc2c(c1=O)c(O)cc(c2)O</chem>   |
| ZINC00391976                     | 0.987 | <chem>Oc1ccc2c(c1)occ(c2=O)c1ccc(c(c1)O)O</chem>      |
| ZINC06525252                     | 0.985 | <chem>Oc1ccc(c(c1)O)c1coc2c(c1=O)ccc(c2)O</chem>      |
| ZINC06092209                     | 0.984 | <chem>Oc1cc(O)c2c(c1)occ(c2=O)c1ccc(c(c1)O)O</chem>   |
| ZINC02392251                     | 0.981 | <chem>Oc1cccc(c1)c1coc2c(c1=O)ccc(c2)O</chem>         |
| ZINC00391977                     | 0.981 | <chem>Oc1ccc(cc1)c1coc2c(c1=O)cc(c(c2)O)O</chem>      |
| ZINC02149675                     | 0.975 | <chem>Oc1cc(O)c2c(c1)occ(c2=O)c1cccc1</chem>          |
| ZINC34259774                     | 0.972 | <chem>Oc1ccc(cc1)c1cc2c(O)cc(cc2oc1=O)O</chem>        |
| ZINC06093399                     | 0.969 | <chem>Oc1ccc(cc1)c1coc2c(c1=O)ccc(c2O)O</chem>        |
| ZINC18847034                     | 0.965 | <chem>Oc1ccc(cc1)c1coc2c(c1=O)ccc(c2)O</chem>         |
| ZINC18847037                     | 0.949 | <chem>COc1ccc(cc1)c1coc2c(c1=O)c(O)cc(c2)O</chem>     |
| ZINC02561259                     | 0.946 | <chem>COc1cc(ccc1O)c1coc2c(c1=O)c(O)cc(c2)O</chem>    |
| ZINC00304562                     | 0.939 | <chem>Oc1cc(O)c2c(c1)occ(c2=O)c1ccc(cc1)Br</chem>     |
| ZINC28631041                     | 0.932 | <chem>Oc1ccc(cc1)c1coc2c(c1=O)ccc(c2C)O</chem>        |
| ZINC05999775                     | 0.931 | <chem>Oc1cc2occ(c(=O)c2cc1O)c1cccc1</chem>            |
| ZINC05731331                     | 0.93  | <chem>Oc1cc(O)c2c(c1)occ(c2=O)c1cccc1F</chem>         |
| ZINC14924498                     | 0.929 | <chem>Oc1ccc(cc1O)c1coc2c(c1=O)c(O)cc(c2Cl)O</chem>   |
| ZINC05997152                     | 0.929 | <chem>Oc1cc(O)c2c(c1)occ(c2=O)c1ccc(cc1)F</chem>      |
| ZINC06484607                     | 0.928 | <chem>COc1ccc(cc1O)c1coc2c(c1=O)c(O)cc(c2)O</chem>    |
| ZINC05731170                     | 0.926 | <chem>Oc1cc(O)c2c(c1)occ(c2=O)c1ccc(cc1)Cl</chem>     |
| ZINC06484559                     | 0.922 | <chem>COc1ccc(cc1)c1coc2c(c1=O)cc(c(c2)O)O</chem>     |
| ZINC14758993                     | 0.92  | <chem>COc1cc(O)cc2c1c(=O)c(co2)c1ccc(cc1O)O</chem>    |
| ZINC05730173                     | 0.919 | <chem>Oc1cc(O)c2c(c1)oc(c(c2=O)c1cccc1)C</chem>       |
| ZINC06018563                     | 0.919 | <chem>COc1ccc(cc1O)c1coc2c(c1=O)ccc(c2)O</chem>       |
| ZINC14982695                     | 0.917 | <chem>Oc1cc(O)c2c(c1)oc(=O)c(c2)c1cccc1</chem>        |
| ZINC94993400                     | 0.905 | <chem>Oc1cc(O)c2c(c1)occ(c2=O)c1cccc1Cl</chem>        |
| ZINC13124366                     | 0.903 | <chem>COc1cc(O)cc2c1c(=O)c(co2)c1ccc(cc1)O</chem>     |
| ZINC00899915                     | 0.897 | <chem>COc1c(O)cc2c(c1O)c(=O)c(co2)c1ccc(cc1)O</chem>  |
| ZINC03874807                     | 0.885 | <chem>COc1c(O)cc(c2c1occ(c2=O)c1ccc(cc1)O)O</chem>    |
| ZINC20272107                     | 0.88  | <chem>Nc1ccc(cc1)c1coc2c(c1=O)ccc(c2)O</chem>         |
| ZINC38418848                     | 0.873 | <chem>Oc1ccc(cc1)c1cc2ccc(cc2oc1=O)O</chem>           |
| ZINC94993451                     | 0.854 | <chem>Oc1cc(O)c2c(c1)oc(c(c2=O)c1ccc(cc1)Cl)C</chem>  |
| ZINC18847036                     | 0.852 | <chem>COc1ccc(cc1)c1coc2c(c1=O)ccc(c2)O</chem>        |
| ZINC12428608                     | 0.847 | <chem>Oc1ccc(cc1)c1coc2c(c1=O)c(O)ccc2</chem>         |
| ZINC06556138                     | 0.843 | <chem>COc1cccc1c1coc2c(c1=O)c(O)cc(c2)O</chem>        |
| ZINC06484558                     | 0.84  | <chem>COc1ccc(cc1)c1coc2c(c1=O)c(O)c(c(c2)O)OC</chem> |

## Supplementary materials

|              |       |                                               |
|--------------|-------|-----------------------------------------------|
| ZINC08015480 | 0.833 | Oc1ccc(cc1)c1c(C)oc2c(c1=O)ccc(c2)O           |
| ZINC14759160 | 0.832 | COc1ccc(cc1O)c1coc2c(c1=O)cc(c(c2)O)OC        |
| ZINC05999205 | 0.83  | COc1cc2c(cc1O)occ(c2=O)c1ccc(cc1)O            |
| ZINC08379245 | 0.819 | [O-][N+](=O)c1ccc(cc1)c1coc2c(c1=O)ccc(c2O)O  |
| ZINC13518422 | 0.813 | Oc1ccc2c(c1)occ(c2=O)c1ccccc1                 |
| ZINC05010172 | 0.805 | Oc1ccc2c(c1)occ(c2=O)c1ccc(cc1)[N+](=O)[O-]   |
| ZINC03871576 | 0.794 | Oc1ccc(cc1)c1cc(=O)c2c(o1)cc(cc2O)O           |
| ZINC05765089 | 0.792 | Oc1cc(C)c2c(c1)oc1c(c2=O)c(O)cc(c1)O          |
| ZINC06556398 | 0.789 | COc1ccc(cc1)c1c(C)oc2c(c1=O)c(O)cc(c2)O       |
| ZINC02559341 | 0.78  | COc1cc(O)ccc1c1coc2c(c1=O)ccc(c2)O            |
| ZINC06557424 | 0.776 | Fc1ccc(cc1)c1coc2c(c1=O)ccc(c2O)O             |
| ZINC14761282 | 0.763 | Oc1cc(O)c2c(c1)oc1c(c2=O)c(C)c(c(c1)O)O       |
| ZINC06556311 | 0.758 | Oc1ccc2c(c1C)occ(c2=O)c1ccccc1                |
| ZINC02131332 | 0.757 | Oc1ccc2c(c1)oc(=O)c(c2)c1cc(=O)oc2c1ccc(c2O)O |
| ZINC94993418 | 0.757 | OCc1c(O)ccc2c1occ(c2=O)c1ccccc1F              |
| ZINC14759216 | 0.756 | COc1ccc(cc1O)c1coc2c(c1=O)ccc(c2OC)O          |
| ZINC13555056 | 0.753 | Oc1ccc(cc1)c1coc2c(c1=O)cccc2                 |
| ZINC71405008 | 0.753 | Oc1ccc(cc1)c1coc2c(c1=O)c1ccccc1cc2           |
| ZINC18185774 | 0.752 | Oc1cc(O)c2c(c1)oc(cc2=O)c1ccc(c(c1)O)O        |
| ZINC02573898 | 0.751 | Oc1cc(O)c2c(c1)oc(=O)c(c2C)c1ccccc1           |
| ZINC18847044 | 0.747 | COc1cc(O)c2c(c1)occ(c2=O)c1ccc(cc1)O          |
| ZINC06534275 | 0.746 | Oc1cc(O)c2c(c1)occ(c2=O)c1ccccc1              |
| ZINC57312208 | 0.743 | OCc1c(O)ccc2c1occ(c2=O)c1ccc(cc1)F            |
| ZINC06557553 | 0.736 | Clc1ccccc1c1coc2c(c1=O)ccc(c2O)O              |
| ZINC06556076 | 0.735 | COc1cc(ccc1OC)c1coc2c(c1=O)c(O)cc(c2)O        |
| ZINC17887543 | 0.731 | Oc1ccc2c(c1)oc(cc2=O)c1cc(O)c(c(c1)O)O        |
| ZINC06018481 | 0.729 | COc1ccc(cc1)c1coc2c(c1=O)c(O)cc(c2)OC         |
| ZINC64219018 | 0.724 | Cc1cc(O)c2c(c1)occ(c2=O)c1ccc(cc1)O           |
| ZINC00968077 | 0.724 | COc1ccc2c(c1)occ(c2=O)c1ccc(cc1)O             |
| ZINC05731171 | 0.724 | BrC1ccc(cc1)c1coc2c(c1=O)ccc(c2)O             |
| ZINC18847051 | 0.72  | Oc1ccc2c(c1)occ(c2=O)c1ccc2c(c1)OCO2          |
| ZINC05730178 | 0.712 | Cc1oc2c(O)c(O)ccc2c(=O)c1c1ccccc1             |
| ZINC00057588 | 0.704 | COc1ccc(cc1)c1coc2c(c1=O)ccc(c2)OC            |
| ZINC00058170 | 0.69  | COc1ccc(cc1)c1coc2c(c1=O)c(OC)cc(c2)OC        |
| ZINC02566738 | 0.69  | COc1cc(OC)cc2c1c(=O)c(co2)c1ccccc1            |
| ZINC11865257 | 0.69  | COc1cc(OC)cc2c1c(=O)c(co2)c1ccc(cc1)O         |
| ZINC11865149 | 0.684 | COc1ccc(cc1)c1coc2c(c1=O)ccc(c2C)O            |
| ZINC00046554 | 0.678 | COc1ccc2c(c1)occ(c2=O)c1ccccc1                |
| ZINC05817433 | 0.664 | CC(Oc1ccc(cc1)c1coc2c(c1=O)ccc(c2)O)C         |
| ZINC05732527 | 0.657 | COc1cc(cc(c1OC)O)c1coc2c(c1=O)c(O)c(c(c2)O)OC |
| ZINC14761164 | 0.654 | Oc1ccc(cc1O)c1cc(=O)c2c(o1)cc(c(c2O)C)O       |
| ZINC02553970 | 0.648 | COc1cc2c(cc1O)occ(c2=O)c1ccc(cc1)OC(=O)C      |
| ZINC02576403 | 0.644 | CCOc1ccc2c(c1)occ(c2=O)c1ccc(cc1)O            |
| ZINC02545404 | 0.636 | Oc1cc(C)c2c(c1)occ(c2=O)c1ccccc1              |

## Supplementary materials

|                   |       |                                                             |
|-------------------|-------|-------------------------------------------------------------|
| ZINC00307531      | 0.636 | <chem>Fc1ccc(cc1)c1coc2c(c1=O)ccc(c2)O</chem>               |
| ZINC05731172      | 0.636 | <chem>Clc1ccc(cc1)c1coc2c(c1=O)ccc(c2)O</chem>              |
| ZINC05817431      | 0.631 | <chem>CC(Oc1cc(O)c2c(c1)occ(c2=O)c1ccc(cc1)O)C</chem>       |
| ZINC48057119      | 0.624 | <chem>Oc1ccc(cc1)c1coc2c(c1=O)cc(c(c2)C)C</chem>            |
| ZINC04282141      | 0.624 | <chem>Oc1cc(O)c2c(c1)occ(c2=O)c1ccc2c(c1)OCCO2</chem>       |
| ZINC00134646      | 0.624 | <chem>COc1ccc(cc1)c1coc2c(c1=O)cccc2</chem>                 |
| ZINC48057013      | 0.623 | <chem>COc1ccc(cc1)c1coc2c(c1=O)ccc(c2C)OC</chem>            |
| ZINC00490845      | 0.623 | <chem>CCOc1ccc2c(c1)occ(c2=O)c1ccc(cc1)OC</chem>            |
| ZINC02573896      | 0.621 | <chem>COc1ccc(cc1)c1c(=O)oc2c(c1C)c(O)cc(c2)O</chem>        |
| ZINC14811680      | 0.619 | <chem>Oc1cc(O)c2c(c1)oc(=O)c(c2O)c1cccc1</chem>             |
| ZINC13520048      | 0.615 | <chem>Oc1cc(O)c2c(c1)oc(cc2=O)c1cc(O)c(c(c1)O)O</chem>      |
| ZINC57312206      | 0.612 | <chem>OCc1c(O)ccc2c1oc(C)c(c2=O)c1ccc(cc1)F</chem>          |
| ZINC06796105      | 0.607 | <chem>Fc1ccc(cc1)c1c(C)oc2c(c1=O)ccc(c2O)O</chem>           |
| ZINC03473319      | 0.607 | <chem>COc1ccc2c(c1)occ(c2=O)c1ccc(cc1O)O</chem>             |
| ZINC39289884      | 0.607 | <chem>COc1ccc2c(c1)occ(c2=O)c1cc(O)c(c(c1)O)O</chem>        |
| ZINC05925628      | 0.604 | <chem>Nc1ccc(cc1)c1c(C)oc2c(c1=O)ccc(c2)O</chem>            |
| ZINC02563647      | 0.603 | <chem>COc1ccc(cc1)c1coc2c(c1=O)cc(c(c2)OC)O</chem>          |
| ZINC06018480      | 0.603 | <chem>COc1ccc(cc1)c1coc2c(c1=O)cc(c(c2)O)OC</chem>          |
| ZINC06008303      | 0.601 | <chem>COc1cccc1c1c(C)oc2c(c1=O)c(O)cc(c2)O</chem>           |
| ZINC02553967      | 0.573 | <chem>COc1cc2c(cc1O)occ(c2=O)c1cccc1</chem>                 |
| ZINC00004016      | 0.573 | <chem>CC(Oc1ccc2c(c1)occ(c2=O)c1cccc1)C</chem>              |
| ZINC71404828      | 0.571 | <chem>Oc1cccc(c1)c1coc2c(c1=O)ccc1c2cccc1</chem>            |
| ZINC71404826      | 0.571 | <chem>Oc1cccc(c1)c1coc2c(c1=O)c1cccc1cc2</chem>             |
| ZINC14759265      | 0.571 | <chem>COc1ccc(cc1)c1coc2c(c1=O)c(O)c(c(c2)OC)OC</chem>      |
| ZINC00629835      | 0.571 | <chem>CCOc1ccc(cc1)c1coc2c(c1=O)c(OCC)cc(c2)OCC</chem>      |
| ZINC11865148      | 0.562 | <chem>COc1ccc(cc1)c1coc2c(c1=O)c(C)cc(c2)O</chem>           |
| ZINC05686755      | 0.562 | <chem>CCc1cc2c(cc1O)occ(c2=O)c1ccc(cc1)OC</chem>            |
| ZINC19703228      | 0.56  | <chem>Oc1ccc2c(c1)occ(c2=O)c1ccc2c(c1)cc(o2)C(=O)O</chem>   |
| ZINC05842416      | 0.555 | <chem>Oc1ccc(cc1)c1cc(=O)c2c(o1)cc(c(c2O)O)O</chem>         |
| ZINC06483767      | 0.553 | <chem>Oc1cc(O)c2c(c1)oc(c(c2=O)C)C</chem>                   |
| ZINC00162916      | 0.553 | <chem>COc1cccc(c1)c1coc2c(c1=O)ccc(c2)O</chem>              |
| ZINC05686285      | 0.553 | <chem>CCCc1cc2c(cc1O)occ(c2=O)c1cccc1</chem>                |
| ZINC01081057      | 0.552 | <chem>COc1cc(OC)cc2c1c(=O)c(co2)c1ccc(cc1)Br</chem>         |
| ZINC00058158      | 0.514 | <chem>COc1cc(OC)cc2c1c(=O)c(co2)c1ccc(cc1)Cl</chem>         |
| ZINC05195795      | 0.514 | <chem>CC(=CCc1c(O)cc2c(c1O)c(=O)c(co2)c1ccc(cc1)O)C</chem>  |
| ZINC05730811      | 0.513 | <chem>Oc1ccc2c(c1)oc(c(c2=O)c1cccc1C)C</chem>               |
| ZINC02405925      | 0.474 | <chem>N#CCOc1ccc2c(c1)occ(c2=O)c1cccc1</chem>               |
| ZINC06090922      | 0.473 | <chem>Oc1cc(O)c2c(c1)oc1c(c2=O)cc(c(c1)O)O</chem>           |
| ZINC03871358      | 0.473 | <chem>COc1ccc(cc1)c1cc(=O)c2c(o1)cc(cc2O)O</chem>           |
| ZINC34909584      | 0.469 | <chem>Cc1ccc(cc1)c1coc2c(c1=O)cc(cc2)C</chem>               |
| ZINC14819517(8PG) | 0.45  | <chem>CC(C)=CCc1c(O)cc(O)c2c(=O)c(-c3ccc(O)cc3)coc12</chem> |
| ZINC06383544      | 0.448 | <chem>COc1ccc(cc1)c1c(C)oc2c(c1=O)ccc(c2C)O</chem>          |
| ZINC95457398      | 0.431 | <chem>COc1ccc(cc1)c1coc2c(c1=O)ccc(c2)OCC1CCC1</chem>       |
| ZINC11865286      | 0.431 | <chem>Brc1ccc(cc1)c1c(=O)oc2c(c1O)ccc(c2)O</chem>           |

## Supplementary materials

|              |       |                                                             |
|--------------|-------|-------------------------------------------------------------|
| ZINC02576376 | 0.431 | <chem>BrCCCOc1ccc2c(c1)occ(c2=O)c1ccc(cc1)O</chem>          |
| ZINC00384434 | 0.426 | <chem>Oc1ccc(c(c1)O)c1cc2ccccc2oc1=O</chem>                 |
| ZINC34909566 | 0.426 | <chem>Cc1ccc2c(c1)occ(c2=O)c1cccc1</chem>                   |
| ZINC11765878 | 0.425 | <chem>Oc1ccc2c(c1)oc(=O)c(c2)c1ccc(cc1)OC(F)(F)F</chem>     |
| ZINC00084913 | 0.425 | <chem>Oc1cc(O)c2c(c1)oc(c(c2=O)c1cccc1)c1cccc1</chem>       |
| ZINC39096796 | 0.42  | <chem>Oc1cc2occ(c(=O)c2c(c1O)O)C</chem>                     |
| ZINC02553968 | 0.414 | <chem>COc1ccc(cc1OC)c1coc2c(c1=O)cc(c(c2)OC)OC</chem>       |
| ZINC00058067 | 0.413 | <chem>Oc1ccc2c(c1)oc(=O)c(c2C)c1cccc1</chem>                |
| ZINC32558314 | 0.413 | <chem>OCc1ccc(cc1)c1coc2c(c1=O)cccc2</chem>                 |
| ZINC57312204 | 0.409 | <chem>CN(Cc1c(O)ccc2c1occ(c2=O)c1ccc(cc1)F)C</chem>         |
| ZINC05854353 | 0.409 | <chem>CC(=CCc1c(O)cc2c(c1O)c(=O)c(co2)c1ccc(cc1O)O)C</chem> |
| ZINC00491307 | 0.402 | <chem>CC(=C)COc1ccc2c(c1)occ(c2=O)c1cccc1</chem>            |
| ZINC02573935 | 0.401 | <chem>Oc1ccc(cc1)c1c(=O)oc2c(c1C)cccc2</chem>               |
| ZINC00057658 | 0.4   | <chem>Oc1ccc(cc1)c1cc(=O)c2c(o1)cc(cc2)O</chem>             |

**Table S3** Summary of the bone protective effects and potential targets of 8PG and genistein.

| cell type                         | Osteoprotective activity |     | Mechanism of action |                           |                           |
|-----------------------------------|--------------------------|-----|---------------------|---------------------------|---------------------------|
|                                   | Activity type            | 8PG | genistein           | 8PG                       | genistein                 |
| <b>pre-adipocyte<br/>(3T3-L1)</b> | adipocyte                |     |                     | FASN↓                     | FASN↓                     |
|                                   | differentiation          | ↓   | ↓                   | Wnt/β-catenin<br>pathway↑ | Wnt/β-catenin<br>pathway↑ |

↓: inhibited; ↑ promoted.
